# Supplementary material
Source: MDPI journal article supplement (https://www.mdpi.com/2073-4395/12/5/1194)

**Figure S2. LD Block for the five QTLs**

**A. LD Block for *qLTGP2***

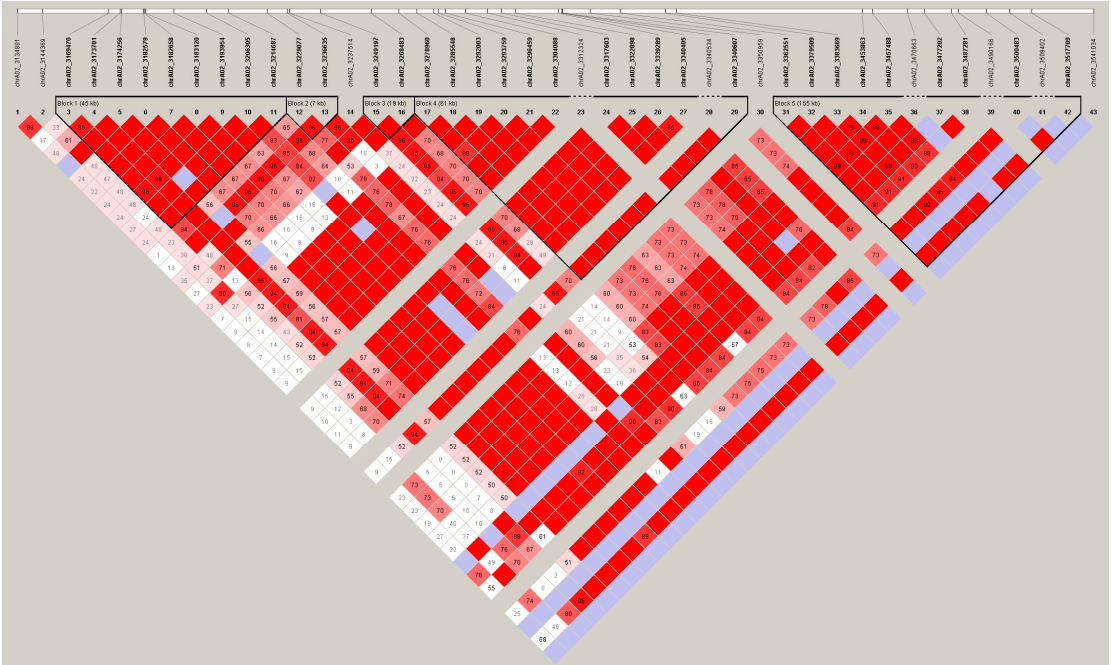

**B. LD Block for *qPLR2***

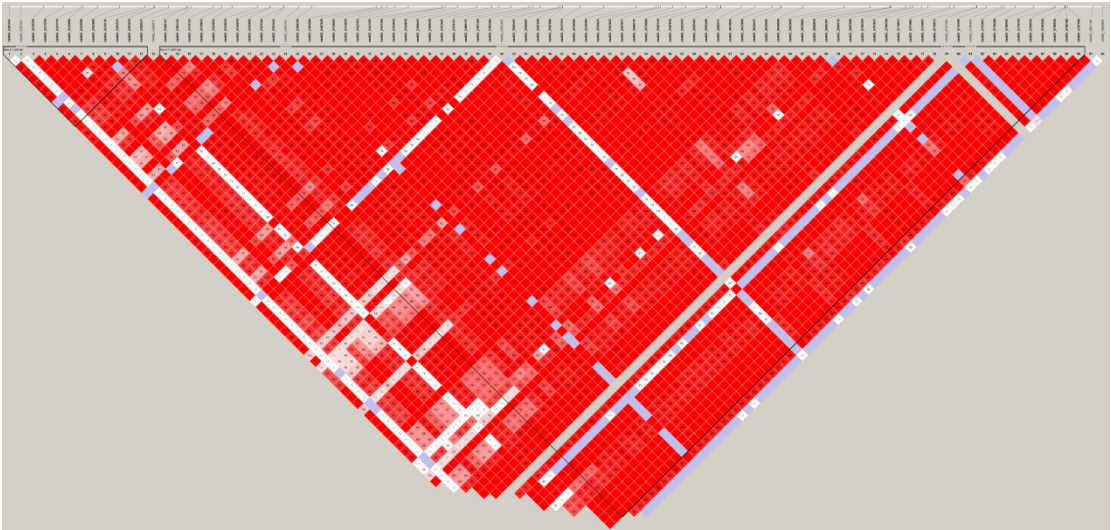

**C. LD Block for *qLTGP5***

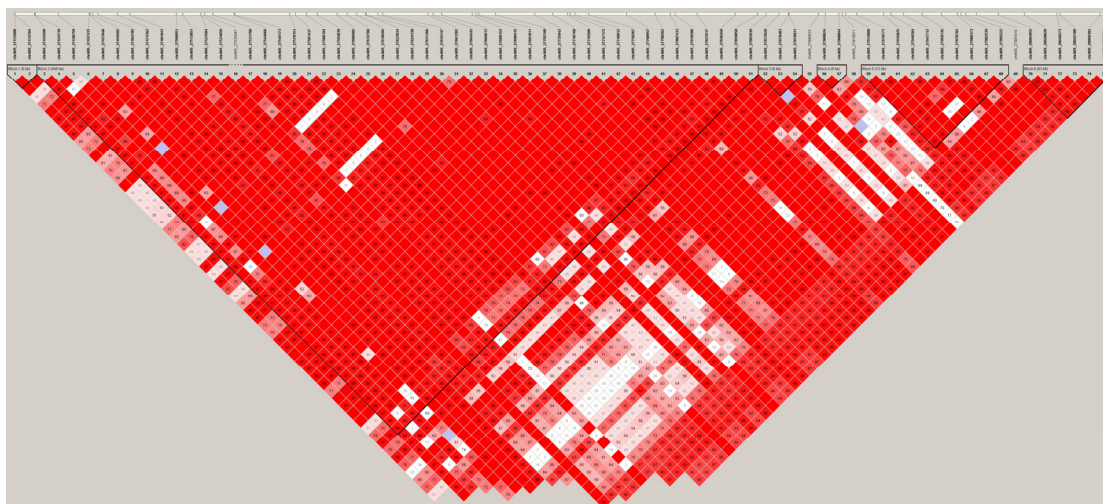

**D.** LD Block for *qRAPL10*

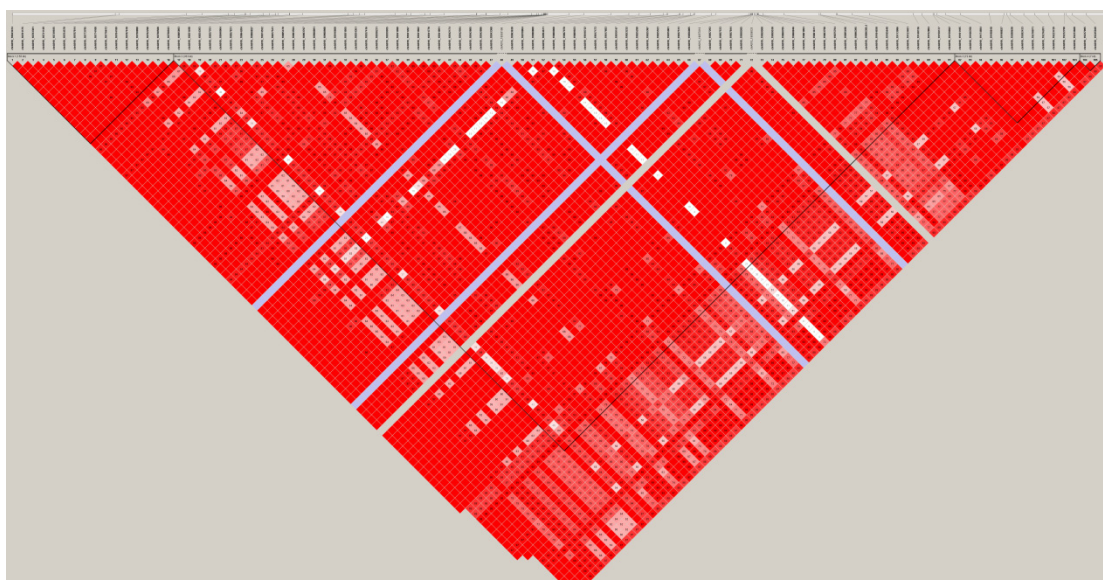

**E.** LD Block for *qRLR12*

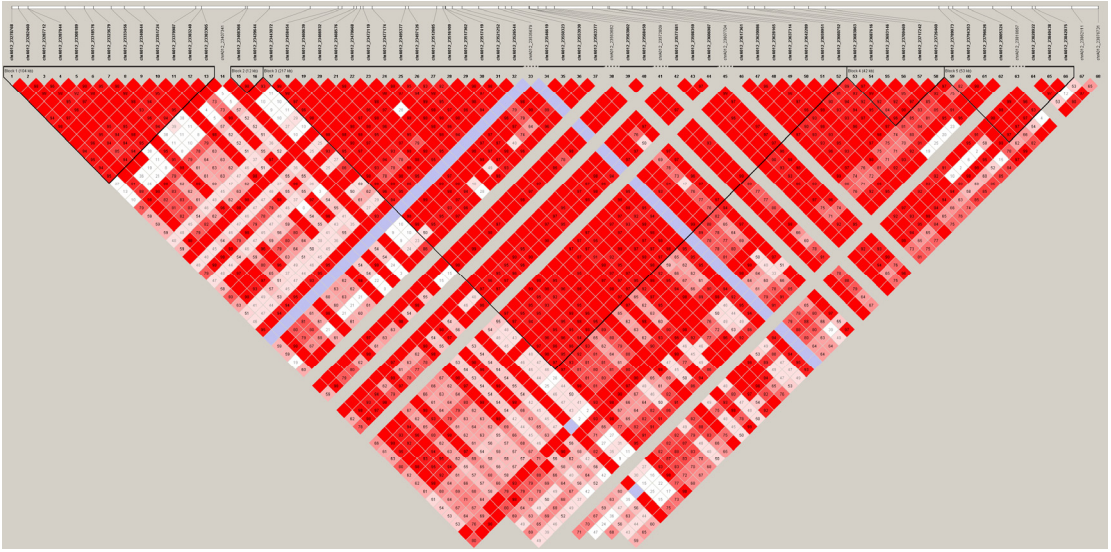

Supplement: s1 [file s1]
