# Supplementary material
Source: MDPI journal article supplement (https://www.mdpi.com/2073-4395/12/5/1194)
Supplement: s1 [file s1]

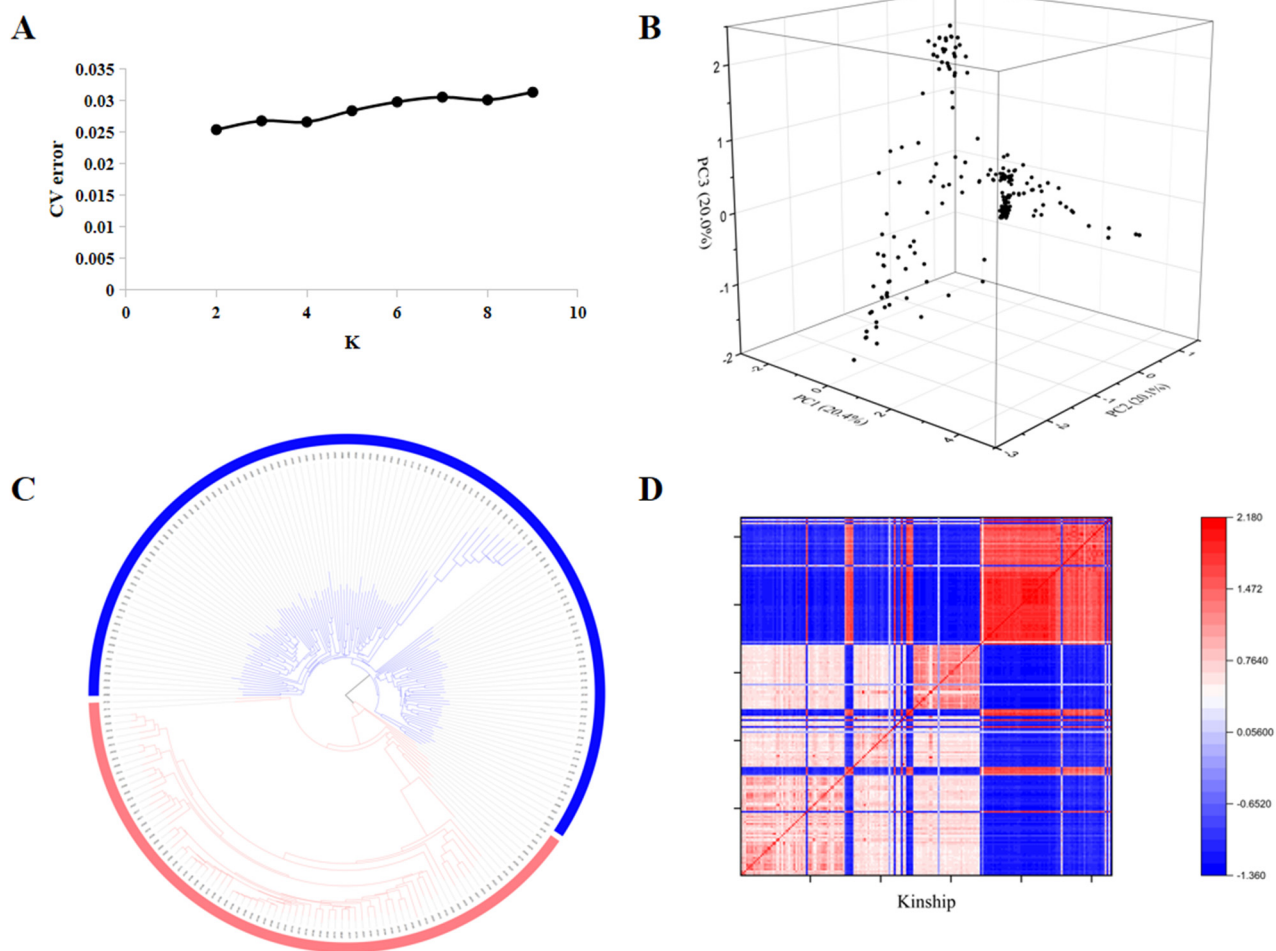

**Figure S1.** Population structure analysis 211 rice accessions. (A) K values plotted as the number of subgroups; (B) Principal component analysis of 211 rice accessions, each black dots represents an accession; (C) Neighbor-joining tree based on Nei's genetic distances; (D) Pairwise relative kinship analysis of 211 rice accessions.
