# Supplementary material
Source: MDPI journal article supplement (https://www.mdpi.com/2073-4395/12/5/1194)
Supplement: s1 [file s1 › Table S1.xls]

## Sheet: Sheet1
Table S1. Phenotypic data and information of the 211 rice varieties
ID#	LTGP(%)	RGP(%)	RPL(%)	PLR(cm)	PLRR	RAPL	CLC (cm)	Province	Subspecies	Name
BK1	95.56	100	25	4.68	0.591667	0.795964	1.13	Jiangxi	indica	Xiangfeng B
BK2	98.89	100	19	3.84	0.513333	0.764268	0.76	Jiangxi	indica	Xiangfeng B progeny
BK3	94.44	100	23	4.52	0.6	0.8933	0.92	Jiangxi	indica	Xiangfeng B progeny
BK4	93.33	98.04	30	3.6	0.405	0.613636	1.17	Guangdong	indica	Wufeng B
BK5	97.78	97.78	18	4.12	0.546667	0.694915	0.84	Guangdong	indica	Wufeng B progeny
BK6	97.78	99.44	18	4.38	0.613333	0.953368	0.7	Guangdong	indica	Wufeng B progeny
BK7	96.67	97.75	21	4.82	0.675	1.10354	0.77	Guangdong	indica	Wufeng B progeny
BK8	96.67	98.08	21	3.76	0.483333	0.717822	0.86	Guangdong	indica	Wufeng B Mutation varieties
BK9	90	99.13	18	3.74	0.505	0.763224	0.71	Guangdong	indica	Wufeng B Mutation varieties
BK10	97.78	100	20	6.08	0.868333	1.19222	0.87	Guangdong	indica	Wufeng B Mutation varieties
BK11	95.56	100	23	5.28	0.736667	1.16623	0.86	Guangdong	indica	Wufeng B Mutation varieties
BK12	94.44	96.04	31	5.16	0.63	0.857143	1.38	Guangdong	indica	Wufeng B Mutation varieties
BK13	100	100	18	4.86	0.671667	0.877996	0.83	Guangdong	indica	Wufeng B Mutation varieties
BK14	97.78	100	22	5.4	0.743333	1.04695	0.94	Guangdong	indica	Wufeng B Mutation varieties
BK15	100	100	22	5.94	0.823333	1.08333	1	Guangdong	indica	Wufeng B Mutation varieties
BK16	97.78	99.44	21	5.7	0.798333	1.11137	0.91	Guangdong	indica	Wufeng B Mutation varieties
BK17	87.78	100	18	5.16	0.708333	0.836614	0.91	Guangdong	indica	Wufeng B Mutation varieties
BK18	96.67	100	32	5.3	0.626667	0.780083	1.54	Guangdong	indica	Wufeng B Mutation varieties
BK19	91.11	91.11	18	5.84	0.836667	1.12054	0.82	Jiangxi	indica	DX66
BK20	98.89	98.89	15	4.22	0.598333	0.879902	0.63	Jiangxi	indica	DX26
BK21	87.77	90.79	39	4.75	0.513333	0.717949	1.67	Jiangxi	indica	H176-1
BK22	100	100	26	4.85	0.608333	0.80308	1.2	Guangxi	indica	Yexiang B
BK23	98.89	98.89	39	5.22	0.62	0.962484	1.5	Jiangxi	indica	Shouji 4
BK24	100	100	31	4.29	0.548333	1.03135	1	Hubei	indica	TC16w10511
BK25	95.56	95.56	20	4.97	0.648333	0.727103	1.08	Zhejiang	indica	Xie B
BK26	93.33	93.33	41	4.59	0.54	0.977376	1.35	Hunan	indica	Bin1 B progeny
BK27	98.89	98.89	20	4.53	0.623333	0.938519	0.79	Jiangxi	indica	Yixing B
BK28	100	100	12	3.82	0.58	1.18166	0.34	Jiangxi	indica	Xiangai B
BK29	95.56	100	24	5.99	0.76	0.752475	1.43	Jiangxi	indica	174B
BK30	85.56	96.86	20	4.77	0.636667	0.82239	0.95	Jiangxi	indica	Fu B progeny
BK31	98.89	98.89	26	5.15	0.695	1.12551	0.98	Jiangxi	indica	Fu B progeny
BK32	91.11	91.11	21	4.71	0.628333	0.831312	0.94	Jiangxi	indica	11 B
BK33	100	100	33	4.68	0.523333	0.66455	1.54	Jiangxi	indica	1040B
BK34	91.11	100	31	4.58	0.64	0.727103	1.25	Jiangxi	indica	Nei3 B
BK35	98.89	100	31	4.58	0.548333	0.800487	1.29	Jiangxi	indica	Shengshi B
BK36	100	100	33	4.77	0.565	0.821818	1.38	Jiangxi	indica	Neixiang10B
BK37	97.78	97.78	26	6.34	0.836667	0.998012	1.32	Jiangxi	indica	82779B
BK38	65.56	69.01	28	4.53	0.651	1.74375	0.624	Jiangxi	indica	435B
BK39	96.67	100	24	5.69	0.758333	0.939112	1.14	Guangdong	indica	Taifeng B
BK40	97.78	100	25	4.89	0.638333	0.892774	1.06	Jiangxi	indica	99B
BK41	95.56	98.85	19	4.35	0.576667	0.722338	0.89	Philippines	indica	Fei9 B
BK42	100	100	22	4.09	0.546667	0.886486	0.81	Guangxi	indica	Yexiang B progeny
BK43	98.89	98.89	21	3.21	0.423333	0.806349	0.67	Jiangxi	indica	Yuxiang B
BK44	94.44	94.44	17	5.7	0.818333	1.06739	0.79	Jiangxi	indica	Xiangtai B
BK45	87.78	90.8	19	5.27	0.758333	1.17268	0.72	Jiangxi	indica	Changnong1 B
BK46	96.67	96.67	34	5.76	0.74	1.15927	1.32	Jiangxi	indica	Changnong2 B
BK47	95.56	100	20	5.33	0.743333	1.04941	0.87	Jiangxi	indica	G4B
BK48	91.11	94.25	19	5.04	0.733333	1.29032	0.64	Jiangxi	indica	Yifeng B
BK49	24.44	37.93	5	5.11	0.83	1.84444	0.13	Hubei	indica	You1 B
BK50	92.22	97.65	15	5.22	0.751667	0.978308	0.71	Jiangxi	indica	Hong B
BK51	92.22	96.5	22	5.04	0.678333	0.908482	0.97	Jiangxi	indica	Shouji 1
BK52	100	100	22	4.77	0.638333	0.901176	0.94	Jiangxi	indica	Shouji2 B
BK53	91.11	93.18	15	3.05	0.423333	0.769697	0.51	Jiangxi	indica	Shouji 2
BK54	97.78	98.88	18	4.55	0.65	1.09244	0.65	Jiangxi	indica	Xian B
BK55	91.11	93.18	19	5.79	0.845	1.3484	0.72	Guangdong	indica	Rongfeng B
BK56	100	100	19	5.55	0.776667	1.17268	0.89	Jiangxi	indica	Fang B
BK57	94.44	96.58	27	4.8	0.636667	1.04372	0.98	Jiangxi	indica	Fu B
BK58	90	96.67	15	4.76	0.72	1.11137	1.02	Jiangxi	indica	Shouji 4 progeny
BK59	91.11	91.11	25	4.93	0.666667	1.06101	0.93	Jiangxi	indica	Yifeng B progeny
BK60	47.78	67.19	32	5.91	0.811667	1.4893	1.04	Sichuan	japonica	Chuangengnuo
BK61	98.89	100	25	4.31	0.573333	0.974504	0.87	Heilongjiang	japonica	Changligeng
BK62	45.56	62.23	9	4.2	0.75	1.12333	0	Beijing	japonica	Jinxianggeng 1
BK63	22.22	34.48	9	5.2	0.816667	1.54088	0.3	Heilongjiang	japonica	Longgeng31
BK64	72.22	80.24	7	4.1	0.645	1.25243	0.23	Heilongjiang	japonica	Changligeng
BK65	93.33	100	20	4.87	0.686667	1.08707	0.75	Jiangxi	indica	Zaoxian45
BK66	90	93.1	14	5.65	0.828333	1.00811	0.68	Jiangxi	indica	Xiangdao
BK67	98.89	100	18	5.59	0.795	1.02581	0.82	Hubei	indica	Hongzao 1
BK68	96.67	96.67	17	4.73	0.671667	0.97343	0.7	Hubei	indica	Tianlongxiang
BK69	94.44	100	31	5.29	0.688333	1.10133	1.16	Hubei	indica	Heiyou 6
BK70	96.67	98.86	32	5.02	0.616667	0.889423	1.32	Hubei	indica	X5017
BK71	100	100	34	4.35	0.518333	0.842818	1.24	Hubei	indica	Jiangtang 1
BK72	98.89	100	27	4.8	0.625	0.979112	1.05	Hubei	indica	Tc16w10512
BK73	93.33	95.45	27	5.11	0.665	0.961446	1.12	Hubei	indica	R6 Pigm
BK74	93.33	94.38	25	5.98	0.815	1.11899	1.09	Hubei	indica	C815S-Bph9 BC4F3
BK75	93.33	95.45	29	5.63	0.723333	0.966592	1.29	Hubei	indica	9113-pigm BC2F3
BK76	85.56	100	29	4.76	0.598333	0.88642	1.17	Sichuan	indica	727-Bph15 BC2F3
BK77	87.78	92.95	21	4.75	0.64	0.890951	0.91	Jiangxi	indica	Changhui881
BK78	97.78	100	28	5.35	0.706667	1.07071	1.11	Jiangxi	indica	Changhui527
BK79	98.89	98.89	14	4.59	0.658333	0.866228	0.64	Jiangxi	indica	Xianghui299
BK80	85	92.17	18	2.77	0.379167	0.8213	0.495	Jiangxi	indica	Changhui T025
BK81	95.56	97.12	7	2.83	0.435	0.774481	0.22	Jiangxi	indica	Changhui R88
BK82	81.11	96.67	34	4.94	0.68	0.856	0.86	Jiangxi	indica	Changhui768
BK83	100	100	40	4.47	0.57	0.67	1.05	Jiangxi	indica	Guanghui398
BK84	88.33	93.53	18	3.52	0.463333	0.666667	0.74	Jiangxi	indica	Changhui891
BK85	91.11	95.34	13	2.67	0.363333	0.590786	0.49	Zhejiang	indica	Huazhan
BK86	96.67	100	12	3.54	0.525	0.951662	0.39	Jiangxi	indica	Changhui871
BK87	94.44	96.58	13	3.57	0.505833	0.747537	0.535	Jiangxi	indica	Meitezhan
BK88	96.67	100	12	4.01	0.605	1.12384	0.38	Jiangxi	indica	Huangxiangmi
BK89	94.44	100	26	4.37	0.58	1.03571	0.89	Jiangxi	indica	Heixiangmi
BK90	91.11	95.34	12	3.42	0.493333	0.745592	0.46	Jiangxi	indica	Zixiangmi
BK91	95.56	96.67	16	4.13	0.555	0.89	0.8	Jiangxi	indica	Hongxiangmi
BK92	97.78	98.34	17	3.59	0.44	0.56	0.95	Jiangxi	indica	Lvxiangmi
BK93	95	97.16	12	4.48	0.6475	0.773904	0.595	Jiangxi	indica	Xiangdao
BK94	100	100	9	3.53	0.538333	0.993846	0.3	Jiangxi	indica	Meixiangxinzhan
BK95	8.3	10.23	3	2.8	0.45	0.876623	0.1	Hubei	indica	Hubeiwangeng 1
BK96	90	91.01	22	2.98	0.421667	1.22222	0.45	Zhejiang	indica	Zhedawangeng TGWQ10
BK97	60	78.26	17	4.61	0.673333	1.17442	0.57	Guangxi	indica	C32
BK98	83.33	85.22	12	5.39	0.814167	1.17711	0.505	Sichuan	indica	Chuannuo
BK99	96.67	98.86	22	5.52	0.731667	0.852427	1.13	Guangxi	indica	Sajin
BK100	98.89	100	22	5.15	0.688333	0.888172	1.02	Guangxi	indica	Sanbaijing
BK101	94.44	95.5	28	5.91	0.765	0.962264	1.32	Guangxi	indica	Guangnian
BK102	60	61.36	19	8.06	1.18167	1.36084	0.97	Guangxi	indica	Panian
BK103	88.89	89.89	22	4.41	0.551667	0.676892	1.1	Guangxi	indica	Maonian
BK104	98.33	100	27	5.59	0.701667	0.817476	1.38	Guangxi	indica	Wujiaonian
BK105	100	100	23	5.66	0.688333	0.78	1.53	Guangxi	indica	Yongxingnian
BK106	100	100	26	7.06	0.941667	1.05805	1.41	Guangxi	indica	Yinguinian
BK107	72.22	81.25	23	7.13	1.005	1.25364	1.1	Guangxi	indica	Maochanghongmi
BK108	93.33	95.45	15	4.22	0.606667	0.933333	0.58	Guangxi	indica	Gui99
BK109	86.67	90.7	13	6.1	0.926667	1.29604	0.54	Guangxi	indica	Zhenhui29
BK110	98.89	98.89	11	6.28	0.965	1.34965	0.49	Guangxi	indica	Baijiaoyouzhan
BK111	96.67	96.67	24	7.22	0.99	1.13576	1.28	Guangxi	indica	Zaoyunnanbai
BK112	92.23	95.41	21	6.65	0.945	1.20382	0.98	Guangxi	indica	Zaomeizhan
BK113	51.11	51.11	10	6.57	1.01167	1.23625	0.5	Guangxi	indica	Chengdumagu
BK114	87.78	92.95	22	6.94	0.966667	1.10687	1.14	Guangxi	indica	Chiyunnanbai
BK115	95.56	96.63	20	6.11	0.821667	0.845626	1.18	Guangxi	indica	Chizhinian
BK116	86.67	87.64	10	7.79	1.21333	1.43874	0.51	Guangxi	indica	Jinbaiyin
BK117	76.67	77.53	10	5.45	0.821667	0.987976	0.52	Guangxi	indica	Qingganzhan
BK118	78.89	79.78	7	4.85	0.753333	0.904	0.33	Guangxi	indica	Jinxianzao
BK119	90	93.1	16	5.32	0.74	0.828358	0.88	Guangxi	indica	Jiecaogu
BK120	86.67	90	15	5.13	0.68	1.12	0.78	Guangxi	indica	Qingzhan
BK121	93.33	94.38	16	6.9	1.01	1.17442	0.84	Guangxi	indica	Guiyangzhan
BK122	98.89	100	14	5.66	0.823333	0.986028	0.72	Guangxi	indica	Shuabagu
BK123	83.33	87.2	16	4.32	0.6025	0.816027	0.705	Guangxi	indica	Meizhan
BK124	94.44	98.83	12	6.29	0.951667	1.15822	0.58	Guangxi	indica	Xiangguangzhan
BK125	85	85	7	5.86	0.916667	1.09344	0.36	Guangxi	indica	Huagu
BK126	80	98.63	7	4.88	0.76	0.974359	0.32	Guangxi	indica	Gui9B
BK127	95.56	96.63	24	5.3	0.693333	0.857732	1.14	Guangxi	indica	Aimagu cp
BK128	100	100	14	5.29	0.753333	0.820327	0.77	Guangxi	indica	Jiuzhan
BK129	43.33	43.82	16	7.24	1.05667	1.14234	0.9	Guangxi	indica	Bala
BK130	63.33	66.27	16	4.58	0.626667	0.710775	0.82	Guangxi	indica	Banbiannuo
BK131	98.89	100	28	6.01	0.776667	0.983122	1.35	Guangxi	indica	Jiangkoubai
BK132	66.67	67.42	14	6.73	1.00667	1.23014	0.69	Guangxi	indica	Hongganma
BK133	94.44	95.5	23	6.18	0.84	1	1.14	Guangxi	indica	Lengshuihong
BK134	100	100	9	5.03	0.763333	0.914172	0.45	Guangxi	indica	Qitoubai
BK135	95.56	100	20	4.87	0.68	1.12	0.79	Guangxi	indica	Mazhan
BK136	93.33	93.33	15	6.21	0.908333	1.06031	0.76	Guangxi	indica	Cunjiangma
BK137	97.78	100	39	5.28	0.676667	1.30547	1.22	Jiangsu	japonica	Liangeng13228
BK138	88.89	89.89	24	4.8	0.665	1.1982	0.81	Tianjin	japonica	Jingengyou2188
BK139	88.89	88.89	38	2.48	0.231667	0.480969	1.09	Anhui	japonica	wankengengWS64
BK140	97.78	98.88	36	4.22	0.53	1.11579	1.04	Tianjin	japonica	Longgeng341054
BK141	97.78	100	37	2.22	0.183333	0.364238	1.12	Beijing	japonica	Xingeng538
BK142	88.89	95.24	39	5.08	0.655	1.3277	1.15	Jiangsu	japonica	Xudao 3
BK143	97.78	100	34	3.78	0.44	0.781065	1.14	Henan	japonica	Xinfeng 6
BK144	91.11	96.33	38	3.7	0.41	0.752294	1.24	Tianjin	japonica	Longgeng71
BK145	98.89	98.89	34	4.6	0.561667	0.930939	1.23	Henan	japonica	Zhengdao21
BK146	95.56	100	32	4.26	0.531667	0.957958	1.07	Henan	japonica	Yugeng136
BK147	96.67	100	30	3.68	0.453333	0.842105	0.96	Anhui	japonica	wankengengJZ21
BK148	96.67	98.86	38	3.58	0.396667	0.760383	1.2	Anhui	japonica	Xingeng599
BK149	80	86.75	42	3.36	0.37	0.819188	1.14	Jiangsu	japonica	Zhendao243
BK150	86.67	97.5	40	3.22	0.38	0.974359	0.94	Liaoning	japonica	Yandao4355
BK151	86.67	91.78	24	3.6	0.46	0.793103	0.84	Henan	japonica	Xinkedao31
BK152	61.11	71.42	32	2.16	0.181667	0.323442	1.07	Shangdong	japonica	RunnongY4
BK153	95.56	95.56	25	6.14	0.908333	1.97464	0.69	Jiangsu	japonica	Suxiu298
BK154	100	100	42	1.9	0.1	0.194805	1.3	Jiangsu	japonica	liangeng14219
BK155	77.78	84.85	25	7.46	1.13	2.52045	0.68	Jiangsu	japonica	Wuyun2007
BK156	95.56	95.56	38	4.72	0.56	0.930748	1.36	Jiangsu	japonica	Zhongken468
BK157	34.44	48.05	20	4.81	0.72	1.7561	0.49	Tianjin	japonica	Jingeng698
BK158	16.67	22.23	5	3.89	0.631667	2.02674	0.1	Jiangsu	japonica	Suxiu633
BK159	63.33	66.66	19	4.16	0.615	1.49696	0.47	Jiangsu	japonica	Wuyun4190
BK160	57.77	99.04	28	3.84	0.560833	1.96784	0.475	Jiangsu	japonica	Yanggeng239
BK161	94.44	97.69	38	4.57	0.625	1.74419	0.82	Jiangsu	japonica	Xudao 9
BK162	77.78	84.85	30	3.68	0.78	1.42	0.63	Jiangsu	japonica	Liangeng 7
BK163	93.33	96.54	22	3.95	0.531667	0.927326	0.76	Jiangsu	japonica	Suxiu 9
BK164	15	23.56	30	2.21	0.316667	1.32	0.31	Jiangsu	japonica	Zhongzuodao 2
BK165	67.78	71.35	22	5.03	0.748333	1.81414	0.54	Jiangsu	japonica	Longgeng968
BK166	81.11	82.49	20	4.56	0.678333	1.6888	0.49	Jiangsu	japonica	Liangeng 12
BK167	22.22	27.21	13	4.18	0.646667	1.73991	0.3	Jiangsu	japonica	Liangeng 6
BK168	84.44	85.87	39	5.35	0.715	1.57431	1.06	Jiangsu	japonica	Zhendao88
BK169	88.89	90.4	36	5.17	0.723333	1.87879	0.83	Jiangsu	japonica	Huaruidao 8
BK170	87.77	89.26	32	5.07	0.718333	1.81092	0.76	Jiangsu	japonica	Zhongzuo1022
BK171	57.77	70.74	40	4.93	0.656667	1.576	0.99	Jiangsu	japonica	Liannuo 1
BK172	52.22	53.11	32	5.03	0.736667	2.33245	0.61	Jiangsu	japonica	Ninggeng 4
BK173	36.67	37.93	9	4.76	0.76	2.11111	0.2	Zhejiang	japonica	Suxiu 10
BK174	55.56	62.9	21	4.33	0.641667	1.69604	0.48	Jiangsu	japonica	Xudao 8
BK175	18.89	29.06	28	4.14	0.606667	2.03352	0.5	Jiangsu	japonica	Liangeng 11
BK176	61.11	79.71	28	4.14	0.588333	1.6082	0.61	Henan	japonica	Yudao518
BK177	12.22	20.22	22	3.79	0.605	1.52	0.16	Jiangsu	japonica	Qiandao1172
BK178	73.33	78.57	20	4.39	0.638333	1.37276	0.56	Shangdong	japonica	Shengdao974
BK179	46.67	62.23	14	5.43	0.838333	1.71088	0.4	Tianjin	japonica	Jingeng667
BK180	8.89	17.78	8	4.89	0.781667	1.93802	0.2	Liaoning	japonica	Liaogeng401
BK181	6.67	17.4	8	3.29	0.515	1.29289	0.2	Liaoning	japonica	Yan1202
BK182	3.3	4.79	3	2.23	0.355	0.671924	0.1	Liaoning	japonica	Yangeng468
BK183	98.33	100	15	4.24	0.605	0.887531	0.61	Jiangsu	japonica	Zaodao906
BK184	10	21.43	4	3.03	0.488333	1.1015	0.1	Jiangsu	japonica	Tiandao21
BK185	12.22	15.56	20	3.1	0.516667	1.04	0.56	Liaoning	japonica	Jinhe 2
BK186	15	23.56	20	3.52	0.82	1.23	0.42	Liaoning	japonica	Liaogeng237
BK187	55.56	62.9	8	3.2	0.48	0.889	0.3	Jiangsu	japonica	Zhongzuo11303
BK188	8.89	10.56	10	3.4	0.32	0.34	1.23	Jiangsu	japonica	Yinhe 6
BK189	18.33	19.88	8	4.2	0.656667	1.23125	0.26	Tianjin	japonica	Longgeng301
BK190	36.67	37.93	12	3.65	0.88	0.96	0.63	Jiangsu	japonica	Xinken 1
BK191	13.33	26.66	6	2.63	0.438333	0.680672	1.01	Liaoning	japonica	Huageng22
BK192	33.33	38.96	20	4.94	0.728333	1.49658	0.57	Liaoning	japonica	Liao1495
BK193	16.67	20	13	3.42	0.501667	0.946541	0.41	Liaoning	japonica	Yangeng185
BK194	13.33	29.26	3	0.8	0.133333	0.221519	0.34	Liaoning	japonica	Dangeng J67
BK195	10	26.47	7	2.63	0.438333	0.896679	0.45	Tianjin	japonica	Longgeng616
BK196	3.33	6.06	5	2.56	0.41	1.36	0.1	Jiangsu	japonica	Zhongzuo2586
BK197	26.67	37.51	6	1.29	0.215	0.344937	0	Liaoning	japonica	Danxing 2
BK198	56.67	62.97	10	4.46	0.698333	1.51264	0.27	Tianjin	japonica	JinyuanD101
BK199	3.33	8.1	9	1.6	0.216667	0.411392	0.3	Jiangsu	japonica	Fuyou303
BK200	10	20.56	10	2.36	0.89	1.57	0.82	Tianjin	japonica	Jinyuan85
BK201	35	36.21	13	4.34	0.643333	1.03763	0.48	Jiangsu	japonica	Luoyu 6
BK202	3.3	6.06	5	2.98	0.463333	0.761644	0.2	Jiangsu	japonica	Huigeng12
BK203	20	25	7	4.08	0.645	1.3391	0.21	Liaoning	japonica	Dongzhuang086
BK204	66.67	71.35	8	3.13	0.65	0.89	0.34	Liaoning	japonica	Yanyu156
BK205	3.3	4.13	10	1.2	0.2	0.307167	0	Liaoning	japonica	Yanfeng47
BK206	31.11	33.73	7	3.73	0.586667	1.16172	0.21	Henan	japonica	Biandao01
BK207	16.67	23.08	9	1.96	0.326667	0.77533	0	Jiangsu	japonica	O2428
BK208	90	91.01	9	3.75	0.568333	0.88342	0.34	Jiangsu	indica	9311
BK209	43.33	62.23	10	3.78	0.62	0.899	0.85	Japan	japonica	Nipponbare
BK210	15	23.56	9	3.2	0.72	1.23	0.78	Japan	japonica	SL38
BK211	93.33	94.38	24	3.4	0.433333	0.778443	0.8	Japan	indica	SL39
