# Supplementary material
Source: MDPI journal article supplement (https://www.mdpi.com/2073-4395/12/5/1194)
Supplement: s1 [file s1 › Table S2.xlsx]

## Sheet: Sheet1
Table S2. Genes annotation from the five QTLs
QTLs ID	Genes	Gene Product Name
qLTGP2	LOC_Os02g06560	wound induced protein, putative, expressed
	LOC_Os02g06570	CAMK_KIN1/SNF1/Nim1_like.13 - CAMK includes calcium/calmodulin depedent protein kinases, expressed
	LOC_Os02g06580	formin, putative, expressed
	LOC_Os02g06584	zinc finger C-x8-C-x5-C-x3-H type family protein, expressed
	LOC_Os02g06588	ATP binding protein, putative, expressed
	LOC_Os02g06592	SNF2 family N-terminal domain containing protein, expressed
	LOC_Os02g06600	receptor-like protein kinase 2 precursor, putative, expressed
	LOC_Os02g06630	peroxidase precursor, putative, expressed
	LOC_Os02g06640	ubiquitin family protein, putative, expressed
qPLR2	LOC_Os02g10130	tubulin binding cofactor C, putative, expressed
	LOC_Os02g10140	bZIP transcription factor domain containing protein, expressed
	LOC_Os02g10150	bZIP transcription factor, putative, expressed
	LOC_Os02g10160	AGAP003371-PA, putative, expressed
	LOC_Os02g10180	dnaJ homolog subfamily C member, putative, expressed
	LOC_Os02g10190	DUF1680 domain containing protein, putative, expressed
	LOC_Os02g10200	zinc finger A20 and AN1 domain-containing stress-associated protein, putative, expressed
	LOC_Os02g10220	heat shock protein DnaJ, putative, expressed
	LOC_Os02g10230	metal cation transporter, putative, expressed
	LOC_Os02g10240	ZOS2-05 - C2H2 zinc finger protein, expressed
	LOC_Os02g10260	outer membrane protein, OMP85 family protein, expressed
	LOC_Os02g10290	copper-transporting ATPase, putative, expressed
	LOC_Os02g10300	polygalacturonase, putative, expressed
	LOC_Os02g10310	fumarylacetoacetase, putative, expressed
	LOC_Os02g10320	3-oxoacyl-synthase, putative, expressed
	LOC_Os02g10350	MLO domain containing protein, putative, expressed
	LOC_Os02g10360	MONOCULM 1, putative, expressed
	LOC_Os02g10370	hrpN-interacting protein from Malus, putative, expressed
	LOC_Os02g10380	Regulator of chromosome condensation domain containing protein, expressed
	LOC_Os02g10390	chlorophyll A-B binding protein, putative, expressed
	LOC_Os02g10430	1-5-phosphoribosyl-5-5-phosphoribosylaminomethylideneaminoimidazole-4-carboxamide isomerase, chloroplast precursor, putative, expressed
	LOC_Os02g10440	protein with a conserved N-terminal region, putative, expressed
	LOC_Os02g10470	EF hand family protein, putative, expressed
	LOC_Os02g10480	stromal membrane-associated protein, putative, expressed
	LOC_Os02g10510	Ubiquitin family domain containing protein, expressed
	LOC_Os02g10520	OsSub12 - Putative Subtilisin homologue, expressed
	LOC_Os02g10540	ribosomal protein L7/L12 C-terminal domain containing protein, expressed
	LOC_Os02g10580	NB-ARC domain containing disease resistance protein, putative, expressed
	LOC_Os02g10590	peptidyl-prolyl cis-trans isomerase, FKBP-type, putative, expressed
	LOC_Os02g10600	OsFBA1 - F-box and FBA domain containing protein, expressed
	LOC_Os02g10630	GRAM and C2 domains containing protein, putative, expressed
	LOC_Os02g10640	26S protease regulatory subunit, putative, expressed
	LOC_Os02g10650	CRAL/TRIO domain containing protein, expressed
	LOC_Os02g10660	glycosyl hydrolases family 17, putative, expressed
	LOC_Os02g10690	targeting protein for Xklp2, putative, expressed
	LOC_Os02g10700	OsFBL7 - F-box domain and LRR containing protein, expressed
	LOC_Os02g10710	hsp20/alpha crystallin family protein, putative, expressed
	LOC_Os02g10740	calcium-binding mitochondrial carrier CBG00135, putative, expressed
	LOC_Os02g10750	CBL-interacting protein kinase, putative, expressed
	LOC_Os02g10760	AP2 domain containing protein, expressed
	LOC_Os02g10770	DEAD-box ATP-dependent RNA helicase 41, putative, expressed
	LOC_Os02g10780	SPX domain containing protein, putative, expressed
	LOC_Os02g10800	mitochondrial carrier protein, putative, expressed
	LOC_Os02g10810	protein of unknown function domain containing protein, expressed
	LOC_Os02g10820	Sel1 repeat domain containing protein, putative, expressed
	LOC_Os02g10830	serine acetyltransferase protein, putative, expressed
	LOC_Os02g10850	OsFBK3 - F-box domain and kelch repeat containing protein, expressed
	LOC_Os02g10860	bZIP transcription factor domain containing protein, expressed
	LOC_Os02g10880	UDP-glucoronosyl and UDP-glucosyl transferase domain containing protein, expressed
	LOC_Os02g10900	NB-ARC domain containing protein, expressed
qLTGP5	LOC_Os05g47840	IPP transferase, putative, expressed
	LOC_Os05g47850	chloroplastic group IIA intron splicing facilitator CRS1, chloroplast precursor, putative, expressed
	LOC_Os05g47880	hypro1, putative, expressed
	LOC_Os05g47890	WD domain, G-beta repeat domain containing protein, expressed
	LOC_Os05g47900	protein binding protein, putative, expressed
	LOC_Os05g47930	OsQSOXL1 quiescin-sulfhydryl oxidase-like OsQSOXL1, expressed
	LOC_Os05g47940	RCLEA8 - Root cap and Late embryogenesis related family protein precursor, expressed
	LOC_Os05g47950	UDP-glucoronosyl and UDP-glucosyl transferase domain containing protein, expressed
	LOC_Os05g47970	microtubule associated protein, putative, expressed
	LOC_Os05g47980	ATP synthase, putative, expressed
	LOC_Os05g48010	MYB family transcription factor, putative, expressed
	LOC_Os05g48020	SNARE domain containing protein, putative, expressed
	LOC_Os05g48030	anti-silencing protein, ASF1-like domain containing protein, expressed
	LOC_Os05g48040	MATE efflux family protein, putative, expressed
	LOC_Os05g48050	ribosomal protein L7/L12 C-terminal domain containing protein, expressed
	LOC_Os05g48060	phosphatidylserine synthase, putative, expressed
	LOC_Os05g48160	2Fe-2S iron-sulfur cluster binding domain containing protein, expressed
	LOC_Os05g48200	glutamate synthase, chloroplast precursor, putative, expressed
	LOC_Os05g48220	60S ribosomal protein L35a-3, putative, expressed
	LOC_Os05g48240	dynamin family protein, putative, expressed
	LOC_Os05g48260	wax synthase, putative, expressed
	LOC_Os05g48270	auxin-responsive protein, putative, expressed
	LOC_Os05g48290	T-complex protein, putative, expressed
	LOC_Os05g48300	purine permease, putative, expressed
	LOC_Os05g48310	60S ribosomal protein L35a-3, putative, expressed
	LOC_Os05g48320	60S ribosomal protein L37a, putative, expressed
	LOC_Os05g48330	aspartyl protease family protein, putative, expressed
	LOC_Os05g48340	proteasome-related, putative, expressed
	LOC_Os05g48360	membrane attack complex component/perforin/complement C9, putative, expressed
	LOC_Os05g48380	ubiquitin-conjugating enzyme domain containing protein, expressed
	LOC_Os05g48390	ubiquitin conjugating enzyme protein, putative, expressed
	LOC_Os05g48410	50S ribosomal protein L21, chloroplast precursor, putative, expressed
	LOC_Os05g48416	lipase-related, putative, expressed
	LOC_Os05g48422	60S ribosomal protein-related, putative, expressed
	LOC_Os05g48440	FAD-binding domain-containing protein, putative, expressed
	LOC_Os05g48450	aminotransferase domain containing protein, putative, expressed
	LOC_Os05g48480	FAD-binding domain-containing protein, putative, expressed
	LOC_Os05g48510	phenylalanyl-tRNA synthetase beta chain, putative, expressed
	LOC_Os05g48520	glyoxal oxidase-related, putative, expressed
	LOC_Os05g48590	OsIAA19 - Auxin-responsive Aux/IAA gene family member, expressed
	LOC_Os05g48600	glycosyltransferase family 43 protein, putative, expressed
qRAPL10	LOC_Os10g35200	katanin p80 WD40 repeat-containing subunit B1 homolog 1, putative, expressed
	LOC_Os10g35220	KH domain containing protein, putative, expressed
	LOC_Os10g35230	Rf1, mitochondrial precursor, putative, expressed
	LOC_Os10g35240	Rf1, mitochondrial precursor, putative, expressed
	LOC_Os10g35250	vacuolar protein-sorting protein bro1, putative, expressed
	LOC_Os10g35260	Rf1, mitochondrial precursor, putative, expressed
	LOC_Os10g35280	nucleolar complex protein 2, putative, expressed
	LOC_Os10g35290	DNA-directed RNA polymerase I subunit RPA2, putative, expressed
	LOC_Os10g35294	fiber protein Fb34, putative, expressed
	LOC_Os10g35300	dof zinc finger domain containing protein, putative, expressed
	LOC_Os10g35370	oxidoreductase, short chain dehydrogenase/reductase family domain containing family, expressed
	LOC_Os10g35390	acyltransferase, putative, expressed
	LOC_Os10g35436	Rf1, mitochondrial precursor, putative, expressed
	LOC_Os10g35440	pentatricopeptide repeat domain containing protein, putative, expressed
	LOC_Os10g35450	serine/threonine-protein kinase, putative, expressed
	LOC_Os10g35460	COBRA, putative, expressed
	LOC_Os10g35470	oxidoreductase, putative, expressed
	LOC_Os10g35480	lanC-like protein 2, putative, expressed
	LOC_Os10g35490	hydrolase, alpha/beta fold family domain containing protein, expressed
	LOC_Os10g35500	epoxide hydrolase, putative, expressed
	LOC_Os10g35520	hydrolase, alpha/beta fold family domain containing protein, expressed
	LOC_Os10g35530	hydrolase, alpha/beta fold family domain containing protein, expressed
	LOC_Os10g35540	hydrolase, alpha/beta fold family domain containing protein, expressed
	LOC_Os10g35550	pre-mRNA-processing factor 6, putative, expressed
	LOC_Os10g35580	ATEB1A-like microtubule associated protein, putative, expressed
	LOC_Os10g35630	cystathionin beta synthase protein, putative, expressed
	LOC_Os10g35640	Rf1, mitochondrial precursor, putative, expressed
	LOC_Os10g35660	MYB family transcription factor, putative, expressed
	LOC_Os10g35670	zinc finger, RING-type, putative, expressed
	LOC_Os10g35680	acetyltransferase, GNAT family, putative, expressed
	LOC_Os10g35690	ribosomal protein S18 containing protein, expressed
	LOC_Os10g35720	OsGrx_S17 - glutaredoxin subgroup II, expressed
	LOC_Os10g35730	pentatricopeptide repeat domain containing protein, putative, expressed
	LOC_Os10g35750	pentatricopeptide, putative, expressed
	LOC_Os10g35760	pentatricopeptide, putative, expressed
	LOC_Os10g35770	E2F-related protein, putative, expressed
	LOC_Os10g35790	Rf1, mitochondrial precursor, putative, expressed
	LOC_Os10g35810	thylakoid lumenal protein, putative, expressed
	LOC_Os10g35840	shikimate/quinate 5-dehydrogenase, putative, expressed
qPLR12	LOC_Os12g38180	heat shock cognate 70 kDa protein 2, putative, expressed
	LOC_Os12g38190	PR-domain zinc finger protein isoform 1, putative
	LOC_Os12g38200	dof zinc finger domain containing protein, putative, expressed
	LOC_Os12g38210	spotted leaf 11, putative, expressed
	LOC_Os12g38270	metallothionein, putative, expressed
	LOC_Os12g38290	metallothionein, putative, expressed
	LOC_Os12g38300	metallothionein, putative, expressed
	LOC_Os12g38310	mitochondrial import inner membrane translocase subunit Tim, putative, expressed
	LOC_Os12g38330	RALFL44 - Rapid ALkalinization Factor RALF family protein precursor, expressed
	LOC_Os12g38340	RALFL42 - Rapid ALkalinization Factor RALF family protein precursor, expressed
	LOC_Os12g38350	RALFL43 - Rapid ALkalinization Factor RALF family protein precursor, expressed
	LOC_Os12g38360	RALFL31 - Rapid ALkalinization Factor RALF family protein precursor, expressed
	LOC_Os12g38370	RALFL41 - Rapid ALkalinization Factor RALF family protein precursor, expressed
	LOC_Os12g38380	tetratricopeptide repeat containing protein, putative, expressed
	LOC_Os12g38400	MYB family transcription factor, putative, expressed
	LOC_Os12g38410	TNP1, putative
	LOC_Os12g38430	SR repressor protein, putative, expressed
	LOC_Os12g38440	XH domain containing protein, expressed
	LOC_Os12g38450	exostosin family domain containing protein, expressed
	LOC_Os12g38460	RNA recognition motif family protein, expressed
	LOC_Os12g38490	SCARECROW, putative, expressed
	LOC_Os12g38510	GRF zinc finger family protein
